# Supplementary material for: The Bioaccessibility and Antioxidant Activities of Fermented Mango Cultivar Juices after Simulated In Vitro Digestion
Source: MDPI journal article supplement (doi:10.3390/foods11172702), 2022-09-05
Supplement: s1 [file s1]

### Supplementary data

**Table S1: Quantification and Validation of the carotenoids**

| Carotenoid       | Equation          | Regression coefficient (R <sup>2</sup> ) | LOD   | LOQ   |
|------------------|-------------------|------------------------------------------|-------|-------|
|                  |                   |                                          |       |       |
| B-carotene       | Y=140594x + 36337 | 0,9979                                   | 6,32  | 19,16 |
| Trans β-carotene | Y=30127x + 15     | 0,9781                                   | 18,02 | 54,61 |
| α-carotene       | Y=26242x-47686    | 0,9987                                   | 4,39  | 13,29 |
| Lutein           | Y=94894x + 834002 | 0,9538                                   | 26,52 | 80,37 |
| Zeaxanthin       | Y=68769x-740682   | 0,9787                                   | 7,31  | 22,15 |
